# Supplementary material for: Evolutionary constraints and expression analysis of gene duplications in Rhodobacter sphaeroides 2.4.1
Source: PubMed Central journal article supplement (PMC3494609; doi:10.1186/1756-0500-5-192), 2012-04-25
Supplement: 1756-0500-5-192-S1.pdf [file 1756-0500-5-192-S1.pdf]

**Table A1** Information of all the 234 duplicate gene-pairs in *R. sphaeroides*

| NO. | <sup>a</sup> Gene 1 | <sup>a</sup> Gene 2 | <sup>b</sup> Location | <sup>c</sup> Paralog | <sup>d</sup> Length | <sup>e</sup> Divergence | <sup>f</sup> $K_a$ | <sup>f</sup> $K_s$ | <sup>g</sup> Correlation | <sup>h</sup> Cosine |
|-----|---------------------|---------------------|-----------------------|----------------------|---------------------|-------------------------|--------------------|--------------------|--------------------------|---------------------|
| 1   | RSP_0036            | RSP_1325            | CI/CI                 | O                    | 181                 | 67                      | 0.619718           | 3.26571            | -0.24183                 | 0.483044            |
| 2   | RSP_0047            | RSP_1588            | CI/CI                 | O                    | 367                 | 58                      | 0.502641           | 3.95110            | 0.95684                  | 0.972713            |
| 3   | RSP_0054            | RSP_2220            | CI/CI                 | O                    | 349                 | 76                      | 0.729505           | 3.76165            | -0.31253                 | 0.405763            |
| 4   | RSP_0056            | RSP_1332            | CI/CI                 | O                    | 439                 | 61                      | 0.600079           | 6.20966            | -0.08762                 | 0.483235            |
| 5   | RSP_0061            | RSP_1310            | CI/CI                 | O                    | 93                  | 65                      | 0.597111           | 2.82532            | -0.23828                 | 0.344105            |
| 6   | RSP_0064            | RSP_1328            | CI/CI                 | O                    | 88                  | 55                      | 0.540962           | 2.83228            | -0.39388                 | 0.314538            |
| 7   | RSP_0065            | RSP_1321            | CI/CI                 | O                    | 265                 | 66                      | 0.673754           | 3.85787            | -0.20476                 | 0.452827            |
| 8   | RSP_0074            | RSP_1304            | CI/CI                 | O                    | 922                 | 71                      | 0.643554           | 4.27036            | 0.60793                  | 0.764089            |
| 9   | RSP_0077            | RSP_1324            | CI/CI                 | O                    | 231                 | 71                      | 0.719888           | 3.43494            | -0.06281                 | 0.410323            |
| 10  | RSP_0079            | RSP_1327            | CI/CI                 | O                    | 245                 | 71                      | 0.579103           | 3.44549            | 0.20524                  | 0.594889            |
| 11  | RSP_0082            | RSP_1330            | CI/CI                 | O                    | 133                 | 72                      | 0.705639           | 2.98898            | -0.07945                 | 0.55382             |
| 12  | RSP_0083            | RSP_1331            | CI/CI                 | O                    | 128                 | 69                      | 0.707407           | 3.11253            | 0.21168                  | 0.584358            |
| 13  | RSP_0100            | RSP_2512            | CI/CI                 | O                    | 125                 | 64                      | 0.618274           | 3.05805            | -0.42671                 | 0.807518            |
| 14  | RSP_0102            | RSP_2515            | CI/CI                 | O                    | 492                 | 59                      | 0.477429           | 3.76816            | -0.62709                 | 0.659012            |
| 15  | RSP_0104            | RSP_2518            | CI/CI                 | O                    | 424                 | 62                      | 0.525843           | 3.81648            | -0.57334                 | 0.739929            |
| 16  | RSP_0105            | RSP_2521            | CI/CI                 | O                    | 757                 | 72                      | 0.671845           | 4.27435            | -0.66780                 | 0.704801            |
| 17  | RSP_0108            | RSP_2525            | CI/CI                 | O                    | 184                 | 69                      | 0.557209           | 3.19609            | -0.33265                 | 0.769601            |
| 18  | RSP_0112            | RSP_2530            | CI/CI                 | O                    | 463                 | 68                      | 0.581917           | 4.08316            | -0.37082                 | 0.703236            |
| 19  | RSP_0146            | RSP_0889            | CI/CI                 | O                    | 112                 | 38                      | 1.007730           | 3.04369            | 0.88652                  | 0.986234            |
| 20  | RSP_0153            | RSP_2225            | CI/CI                 | O                    | 224                 | 57                      | 0.436121           | 3.59200            | 0.18194                  | 0.888719            |
| 21  | RSP_0161            | RSP_1883            | CI/CI                 | I                    | 365                 | 31                      | 0.187245           | 2.25486            | 0.37234                  | 0.960136            |
| 22  | RSP_0176            | RSP_3074            | CI/CII                | O                    | 603                 | 72                      | 0.588085           | 4.06177            | 0.40097                  | 0.961756            |
| 23  | RSP_0180            | RSP_3166            | CI/CII                | O                    | 282                 | 70                      | 0.644876           | 3.60665            | 0.28031                  | 0.875611            |
| 24  | RSP_0183            | RSP_3462            | CI/CII                | O                    | 493                 | 64                      | 0.569228           | 3.99432            | 0.23047                  | 0.924721            |
| 25  | RSP_0189            | RSP_1149            | CI/CI                 | O                    | 460                 | 69                      | 0.609548           | 3.92983            | 0.53417                  | 0.970659            |
| 26  | RSP_0224            | RSP_0658            | CI/CI                 | O                    | 761                 | 69                      | 0.832870           | 4.57555            | 0.47350                  | 0.962005            |
| 27  | RSP_0229            | RSP_2238            | CI/CI                 | O                    | 520                 | 69                      | 0.587149           | 4.08485            | 0.54042                  | 0.940408            |
| 28  | RSP_0235            | RSP_3050            | CI/CII                | I                    | 341                 | 35                      | 0.227430           | 3.75074            | -0.65361                 | 0.369922            |

|    |          |          |        |   |      |    |          |         |          |          |
|----|----------|----------|--------|---|------|----|----------|---------|----------|----------|
| 29 | RSP_0248 | RSP_0479 | CI/CI  | O | 188  | 64 | 0.516304 | 3.14339 | 0.75035  | 0.962806 |
| 30 | RSP_0254 | RSP_1134 | CI/CI  | O | 643  | 34 | 0.226694 | 4.25846 | 0.79379  | 0.950448 |
| 31 | RSP_0287 | RSP_2827 | CI/CI  | O | 1136 | 73 | 0.730557 | 4.70011 | 0.40969  | 0.903622 |
| 32 | RSP_0314 | RSP_1556 | CI/CI  | I | 51   | 6  | 0.025501 | 1.45070 | -0.39029 | 0.628320 |
| 33 | RSP_0329 | RSP_3513 | CI/CII | I | 331  | 57 | 0.482733 | 3.78273 | 0.53095  | 0.976105 |
| 34 | RSP_0345 | RSP_3560 | CI/CII | O | 349  | 70 | 0.641227 | 3.62148 | 0.63831  | 0.962674 |
| 35 | RSP_0382 | RSP_1257 | CI/CI  | O | 587  | 64 | 0.901936 | 3.82518 | 0.52019  | 0.961498 |
| 36 | RSP_0413 | RSP_4018 | CI/PB  | O | 386  | 60 | 0.549848 | 3.80629 | 0.51687  | 0.965129 |
| 37 | RSP_0423 | RSP_3201 | CI/CII | O | 343  | 67 | 0.517721 | 3.72934 | -0.19562 | 0.906776 |
| 38 | RSP_0476 | RSP_2364 | CI/CI  | I | 216  | 29 | 0.180002 | 3.40030 | -0.34370 | 0.382804 |
| 39 | RSP_0480 | RSP_0096 | CI/CI  | O | 466  | 59 | 0.507366 | 4.06191 | 0.01518  | 0.810101 |
| 40 | RSP_0563 | RSP_2815 | CI/CI  | O | 309  | 65 | 0.566510 | 3.71914 | 0.80608  | 0.986519 |
| 41 | RSP_0576 | RSP_3142 | CI/CII | O | 591  | 70 | 0.616942 | 4.01171 | -0.53415 | 0.855879 |
| 42 | RSP_0578 | RSP_1736 | CI/CI  | O | 217  | 54 | 0.387049 | 3.41171 | 0.21906  | 0.902215 |
| 43 | RSP_0601 | RSP_2410 | CI/CI  | O | 295  | 53 | 0.471178 | 3.56268 | 0.41815  | 0.826388 |
| 44 | RSP_0632 | RSP_2155 | CI/CI  | O | 438  | 62 | 0.541112 | 4.01125 | 0.68935  | 0.942882 |
| 45 | RSP_0656 | RSP_3330 | CI/CII | I | 592  | 36 | 0.234671 | 2.99804 | 0.73127  | 0.968786 |
| 46 | RSP_0672 | RSP_0920 | CI/CI  | O | 291  | 60 | 0.571208 | 3.48936 | 0.70388  | 0.926450 |
| 47 | RSP_0688 | RSP_0550 | CI/CI  | O | 428  | 68 | 0.645670 | 3.69382 | 0.58693  | 0.965885 |
| 48 | RSP_0692 | RSP_3027 | CI/CII | I | 473  | 33 | 0.219237 | 3.96259 | -0.61582 | 0.869111 |
| 49 | RSP_0698 | RSP_2572 | CI/CI  | O | 256  | 65 | 0.669324 | 3.67072 | N/A      | N/A      |
| 50 | RSP_0723 | RSP_0240 | CI/CI  | O | 448  | 69 | 0.593561 | 3.91074 | 0.25612  | 0.809666 |
| 51 | RSP_0759 | RSP_4086 | CI/PC  | O | 369  | 71 | 0.727604 | 3.85339 | 0.28560  | 0.875019 |
| 52 | RSP_0766 | RSP_0013 | CI/CI  | O | 315  | 51 | 0.454135 | 3.61906 | 0.42140  | 0.927419 |
| 53 | RSP_0772 | RSP_1346 | CI/CI  | O | 737  | 57 | 0.435067 | 4.09885 | 0.93844  | 0.971099 |
| 54 | RSP_0817 | RSP_2004 | CI/CI  | O | 447  | 61 | 0.598539 | 3.91600 | 0.57781  | 0.920292 |
| 55 | RSP_0840 | RSP_1989 | CI/CI  | O | 917  | 75 | 0.686148 | 4.28106 | 0.91017  | 0.989070 |
| 56 | RSP_0893 | RSP_1120 | CI/CI  | O | 433  | 72 | 0.759936 | 4.04181 | 0.04014  | 0.924927 |
| 57 | RSP_0902 | RSP_0089 | CI/CI  | O | 221  | 61 | 0.583574 | 3.61005 | 0.66210  | 0.913775 |
| 58 | RSP_0945 | RSP_3035 | CI/CII | O | 483  | 70 | 0.692597 | 4.07412 | 0.37295  | 0.920356 |
| 59 | RSP_0953 | RSP_2415 | CI/CI  | O | 629  | 70 | 0.637515 | 4.01212 | 0.11350  | 0.951903 |

|    |          |          |        |   |      |    |          |         |          |          |
|----|----------|----------|--------|---|------|----|----------|---------|----------|----------|
| 60 | RSP_0961 | RSP_2192 | CI/CI  | O | 681  | 62 | 0.534460 | 4.15548 | -0.38291 | 0.891503 |
| 61 | RSP_0970 | RSP_1771 | CI/CI  | O | 302  | 65 | 0.552980 | 3.74750 | 0.35957  | 0.898710 |
| 62 | RSP_0971 | RSP_2392 | CI/CI  | I | 185  | 48 | 0.326579 | 3.39940 | 0.44409  | 0.942510 |
| 63 | RSP_0976 | RSP_3147 | CI/CII | O | 594  | 68 | 0.617250 | 4.10615 | -0.05216 | 0.954787 |
| 64 | RSP_0979 | RSP_3150 | CI/CII | O | 251  | 65 | 0.543268 | 3.18995 | 0.35558  | 0.908908 |
| 65 | RSP_0990 | RSP_3687 | CI/CII | O | 325  | 72 | 0.652188 | 3.62353 | 0.46991  | 0.966980 |
| 66 | RSP_0992 | RSP_3715 | CI/CII | O | 957  | 55 | 0.422896 | 4.58420 | 0.87909  | 0.974658 |
| 67 | RSP_0993 | RSP_3714 | CI/CII | O | 113  | 50 | 0.314391 | 2.94354 | 0.87215  | 0.964517 |
| 68 | RSP_0994 | RSP_3713 | CI/CII | O | 522  | 59 | 0.418185 | 4.15564 | 0.90304  | 0.981186 |
| 69 | RSP_1013 | RSP_2814 | CI/CI  | O | 433  | 72 | 0.625699 | 3.94540 | 0.57443  | 0.962445 |
| 70 | RSP_1016 | RSP_1572 | CI/CI  | O | 157  | 50 | 0.392085 | 3.17191 | 0.84385  | 0.941937 |
| 71 | RSP_1036 | RSP_1035 | CI/CI  | O | 184  | 70 | 0.813752 | 1.82512 | 0.93167  | 0.991348 |
| 72 | RSP_1097 | RSP_1832 | CI/CI  | O | 434  | 70 | 0.688764 | 3.87651 | 0.66925  | 0.958726 |
| 73 | RSP_1109 | RSP_2147 | CI/CI  | O | 351  | 64 | 0.534060 | 3.67478 | 0.71439  | 0.963471 |
| 74 | RSP_1123 | RSP_3553 | CI/CII | O | 1052 | 70 | 0.645533 | 4.55461 | 0.66865  | 0.964935 |
| 75 | RSP_1184 | RSP_2660 | CI/CI  | O | 326  | 67 | 0.643214 | 3.76786 | 0.54019  | 0.969391 |
| 76 | RSP_1255 | RSP_2305 | CI/CI  | O | 310  | 49 | 0.419082 | 3.11167 | -0.10193 | 0.76224  |
| 77 | RSP_1260 | RSP_6198 | CI/CII | I | 151  | 47 | 0.322542 | 3.19690 | N/A      | N/A      |
| 78 | RSP_1261 | RSP_4060 | CI/PC  | I | 137  | 39 | 0.284662 | 3.21611 | 0.53485  | 0.946446 |
| 79 | RSP_1272 | RSP_2681 | CI/CI  | I | 181  | 52 | 0.456059 | 3.30384 | 0.19479  | 0.934691 |
| 80 | RSP_1278 | RSP_2504 | CI/CI  | O | 224  | 61 | 0.52650  | 3.57211 | -0.17321 | 0.81441  |
| 81 | RSP_1282 | RSP_3271 | CI/CII | O | 473  | 69 | 0.647552 | 3.84736 | 0.91910  | 0.963447 |
| 82 | RSP_1283 | RSP_3270 | CI/CII | O | 357  | 21 | 0.126920 | 3.70433 | 0.83414  | 0.924013 |
| 83 | RSP_1284 | RSP_3267 | CI/CII | I | 291  | 13 | 0.068597 | 3.46547 | 0.82597  | 0.923523 |
| 84 | RSP_1285 | RSP_3266 | CI/CII | I | 332  | 32 | 0.233917 | 3.70860 | 0.91496  | 0.966171 |
| 85 | RSP_1303 | RSP_0080 | CI/CI  | O | 444  | 75 | 0.657570 | 3.94795 | 0.31454  | 0.624023 |
| 86 | RSP_1307 | RSP_0076 | CI/CI  | O | 367  | 57 | 0.499651 | 4.07544 | -0.63186 | 0.327754 |
| 87 | RSP_1309 | RSP_0063 | CI/CI  | O | 270  | 60 | 0.484854 | 3.56010 | 0.23342  | 0.555027 |
| 88 | RSP_1312 | RSP_0053 | CI/CI  | O | 540  | 70 | 0.708251 | 4.18678 | 0.18128  | 0.601536 |
| 89 | RSP_1319 | RSP_0072 | CI/CI  | O | 246  | 55 | 0.524494 | 3.67474 | -0.22564 | 0.545402 |
| 90 | RSP_1320 | RSP_0034 | CI/CI  | O | 696  | 64 | 0.525934 | 4.43753 | -0.25300 | 0.478342 |

|            |          |          |        |   |     |    |          |         |          |          |
|------------|----------|----------|--------|---|-----|----|----------|---------|----------|----------|
| <b>91</b>  | RSP_1322 | RSP_0066 | CI/CI  | O | 370 | 67 | 0.596330 | 3.95845 | 0.06703  | 0.579709 |
| <b>92</b>  | RSP_1326 | RSP_0078 | CI/CI  | O | 262 | 58 | 0.467581 | 3.54658 | -0.17711 | 0.399428 |
| <b>93</b>  | RSP_1379 | RSP_2899 | CI/CI  | O | 484 | 62 | 0.546570 | 4.09397 | 0.68168  | 0.982727 |
| <b>94</b>  | RSP_1463 | RSP_3181 | CI/CII | O | 387 | 70 | 0.611751 | 3.93457 | 0.64618  | 0.961892 |
| <b>95</b>  | RSP_1492 | RSP_1869 | CI/CI  | O | 404 | 65 | 0.557369 | 3.92617 | 0.90769  | 0.98851  |
| <b>96</b>  | RSP_1499 | RSP_3272 | CI/CII | O | 560 | 71 | 0.652656 | 4.17906 | 0.21260  | 0.951588 |
| <b>97</b>  | RSP_1513 | RSP_3585 | CI/CII | O | 405 | 55 | 0.447979 | 2.21730 | 0.30086  | 0.939961 |
| <b>98</b>  | RSP_1532 | RSP_0196 | CI/CI  | O | 427 | 54 | 0.613782 | 3.66485 | -0.00349 | 0.913289 |
| <b>99</b>  | RSP_1551 | RSP_0608 | CI/CI  | O | 127 | 58 | 0.493332 | 3.30214 | 0.67871  | 0.919969 |
| <b>100</b> | RSP_1574 | RSP_0820 | CI/CI  | O | 164 | 65 | 0.548452 | 3.29324 | 0.77904  | 0.922532 |
| <b>101</b> | RSP_1591 | RSP_3122 | CI/CII | O | 329 | 47 | 0.390695 | 3.71051 | 0.30788  | 0.943241 |
| <b>102</b> | RSP_1613 | RSP_1413 | CI/CII | O | 321 | 68 | 0.648508 | 3.77431 | 0.57819  | 0.990283 |
| <b>103</b> | RSP_1614 | RSP_1412 | CI/CII | O | 791 | 67 | 0.540984 | 4.33367 | 0.11322  | 0.95553  |
| <b>104</b> | RSP_1638 | RSP_2062 | CI/CI  | I | 126 | 5  | 0.040646 | 0.46153 | 0.73685  | 0.760409 |
| <b>105</b> | RSP_1645 | RSP_3652 | CI/CII | I | 419 | 4  | 0.056517 | 0.58526 | 0.99327  | 0.969357 |
| <b>106</b> | RSP_1647 | RSP_3650 | CI/CII | I | 312 | 13 | 0.020664 | 0.78935 | 0.75067  | 0.980507 |
| <b>107</b> | RSP_1650 | RSP_2352 | CI/CI  | O | 531 | 68 | 0.645887 | 3.95249 | 0.18626  | 0.817500 |
| <b>108</b> | RSP_1653 | RSP_6190 | CI/CII | I | 208 | 18 | 0.082103 | 1.09486 | N/A      | N/A      |
| <b>109</b> | RSP_1662 | RSP_2080 | CI/CI  | O | 345 | 61 | 0.563715 | 3.89349 | 0.61863  | 0.907341 |
| <b>110</b> | RSP_1696 | RSP_2630 | CI/CI  | O | 837 | 61 | 0.483571 | 4.21750 | 0.84520  | 0.986697 |
| <b>111</b> | RSP_1706 | RSP_1121 | CI/CI  | O | 241 | 60 | 0.549276 | 3.52337 | -0.27708 | 0.815809 |
| <b>112</b> | RSP_1766 | RSP_1848 | CI/CI  | O | 495 | 65 | 0.566813 | 3.79728 | 0.55145  | 0.966212 |
| <b>113</b> | RSP_1767 | RSP_2323 | CI/CI  | O | 250 | 63 | 0.610545 | 3.69283 | 0.35464  | 0.896008 |
| <b>114</b> | RSP_1787 | RSP_2334 | CI/CI  | O | 321 | 63 | 0.588838 | 3.86455 | 0.44511  | 0.949694 |
| <b>115</b> | RSP_1820 | RSP_0088 | CI/CI  | O | 168 | 47 | 0.396037 | 3.13828 | 0.75561  | 0.97212  |
| <b>116</b> | RSP_1843 | RSP_1053 | CI/CI  | O | 449 | 67 | 0.547081 | 3.57513 | 0.83213  | 0.979609 |
| <b>117</b> | RSP_1850 | RSP_1786 | CI/CI  | O | 793 | 65 | 0.702807 | 4.42668 | 0.83239  | 0.983226 |
| <b>118</b> | RSP_1889 | RSP_3093 | CI/CII | O | 242 | 51 | 0.402002 | 3.32604 | 0.30396  | 0.915223 |
| <b>119</b> | RSP_1894 | RSP_2496 | CI/CI  | I | 148 | 19 | 0.091656 | 2.97837 | 0.83145  | 0.956095 |
| <b>120</b> | RSP_1927 | RSP_3172 | CI/CII | O | 275 | 61 | 0.511790 | 3.64482 | 0.43271  | 0.928566 |
| <b>121</b> | RSP_1931 | RSP_2653 | CI/CI  | O | 292 | 69 | 0.636251 | 3.62235 | 0.42616  | 0.904744 |

|     |          |          |        |   |     |    |          |         |          |          |
|-----|----------|----------|--------|---|-----|----|----------|---------|----------|----------|
| 122 | RSP_1944 | RSP_2820 | CI/CI  | O | 248 | 58 | 0.542950 | 3.64774 | 0.10474  | 0.764086 |
| 123 | RSP_1951 | RSP_3622 | CI/CII | I | 116 | 4  | 0.024170 | 0.14281 | 0.21860  | 0.730684 |
| 124 | RSP_1954 | RSP_6191 | CI/CII | I | 84  | 40 | 0.317081 | 2.49821 | N/A      | N/A      |
| 125 | RSP_1955 | RSP_3647 | CI/CII | I | 219 | 28 | 0.207697 | 0.20902 | 0.76438  | 0.877883 |
| 126 | RSP_1956 | RSP_6196 | CI/CII | I | 124 | 8  | 0.039573 | 0.27507 | N/A      | N/A      |
| 127 | RSP_1966 | RSP_3007 | CI/CII | I | 242 | 1  | 0.027940 | 0.05770 | 0.96884  | 0.996295 |
| 128 | RSP_1984 | RSP_2284 | CI/CI  | O | 371 | 70 | 0.746569 | 3.88954 | 0.82256  | 0.992951 |
| 129 | RSP_1998 | RSP_3049 | CI/CII | O | 402 | 62 | 0.578331 | 4.12153 | -0.61255 | 0.230968 |
| 130 | RSP_2061 | RSP_1637 | CI/CI  | I | 70  | 15 | 0.054750 | 0.22191 | 0.12300  | 0.580932 |
| 131 | RSP_2063 | RSP_1639 | CI/CI  | I | 147 | 9  | 0.031705 | 0.30165 | 0.99949  | 0.970009 |
| 132 | RSP_2064 | RSP_6012 | CI/CI  | I | 126 | 11 | 0.048522 | 0.92465 | N/A      | N/A      |
| 133 | RSP_2065 | RSP_1640 | CI/CI  | O | 171 | 61 | 0.421863 | 3.27128 | 0.68874  | 0.964720 |
| 134 | RSP_2098 | RSP_2326 | CI/CI  | O | 623 | 73 | 0.673511 | 4.10123 | 0.84743  | 0.975548 |
| 135 | RSP_2106 | RSP_2325 | CI/CI  | O | 384 | 69 | 0.596186 | 3.79560 | 0.92326  | 0.992759 |
| 136 | RSP_2122 | RSP_3346 | CI/CII | O | 570 | 67 | 0.510323 | 3.30312 | 0.34124  | 0.817039 |
| 137 | RSP_2124 | RSP_3347 | CI/CII | O | 347 | 68 | 0.577281 | 3.73349 | 0.56388  | 0.926372 |
| 138 | RSP_2184 | RSP_3292 | CI/CII | O | 541 | 61 | 0.549624 | 4.10063 | 0.47979  | 0.955524 |
| 139 | RSP_2189 | RSP_2508 | CI/CI  | O | 534 | 68 | 0.607157 | 3.95074 | 0.21921  | 0.768630 |
| 140 | RSP_2201 | RSP_2200 | CI/CI  | O | 129 | 50 | 0.408903 | 3.01908 | 0.51505  | 0.947560 |
| 141 | RSP_2227 | RSP_2886 | CI/CI  | O | 416 | 62 | 0.539259 | 3.84200 | -0.21690 | 0.821566 |
| 142 | RSP_2232 | RSP_1001 | CI/CI  | O | 367 | 61 | 0.541133 | 3.74396 | 0.73552  | 0.978663 |
| 143 | RSP_2247 | RSP_1708 | CI/CI  | O | 687 | 72 | 0.648110 | 4.21820 | 0.64661  | 0.942124 |
| 144 | RSP_2297 | RSP_3935 | CI/PA  | O | 505 | 54 | 0.400796 | 4.06519 | -0.55511 | 0.771039 |
| 145 | RSP_2360 | RSP_2997 | CI/CI  | O | 403 | 71 | 0.833229 | 4.21319 | 0.09133  | 0.772427 |
| 146 | RSP_2397 | RSP_3040 | CI/CII | O | 362 | 68 | 0.662673 | 3.71414 | -0.04336 | 0.906989 |
| 147 | RSP_2441 | RSP_1589 | CI/CI  | I | 588 | 74 | 0.787488 | 4.44180 | -0.14437 | 0.594697 |
| 148 | RSP_2459 | RSP_2809 | CI/CI  | O | 313 | 66 | 0.548626 | 3.66474 | 0.92413  | 0.987299 |
| 149 | RSP_2470 | RSP_2996 | CI/CI  | O | 181 | 49 | 0.673937 | 3.66838 | 0.14258  | 0.858435 |
| 150 | RSP_2482 | RSP_4189 | PC/PD  | I | 294 | 6  | 0.026956 | 0.56079 | 0.91622  | 0.925024 |
| 151 | RSP_2501 | RSP_3873 | CI/PA  | O | 278 | 54 | 0.466219 | 3.88168 | 0.80268  | 0.968882 |
| 152 | RSP_2513 | RSP_0101 | CI/CI  | O | 190 | 47 | 0.391735 | 3.09759 | -0.56462 | 0.756161 |

|     |           |          |        |   |     |    |          |         |          |          |
|-----|-----------|----------|--------|---|-----|----|----------|---------|----------|----------|
| 153 | RSP_2522  | RSP_0106 | CI/CI  | O | 332 | 57 | 0.472156 | 3.77278 | -0.57882 | 0.792289 |
| 154 | RSP_2523  | RSP_0107 | CI/CI  | O | 166 | 57 | 0.533028 | 2.95182 | -0.45876 | 0.796510 |
| 155 | RSP_2527  | RSP_0110 | CI/CI  | O | 386 | 66 | 0.537245 | 4.21251 | -0.18680 | 0.756615 |
| 156 | RSP_2565  | RSP_1159 | CI/CI  | O | 305 | 34 | 0.219552 | 3.66802 | 0.71559  | 0.982516 |
| 157 | RSP_2592  | RSP_2881 | CI/CI  | O | 388 | 57 | 0.471463 | 3.98845 | 0.25824  | 0.948761 |
| 158 | RSP_2607  | RSP_3017 | CI/CII | O | 169 | 58 | 0.465102 | 3.19704 | -0.20389 | 0.818699 |
| 159 | RSP_2618  | RSP_3826 | CI/CII | O | 256 | 65 | 0.612057 | 3.66259 | 0.87986  | 0.981221 |
| 160 | RSP_2623N | RSP_2850 | CI/CI  | O | 930 | 65 | 0.638109 | 4.36294 | N/A      | N/A      |
| 161 | RSP_2673  | RSP_2578 | CI/CI  | O | 691 | 75 | 0.655391 | 4.03489 | 0.11597  | 0.941579 |
| 162 | RSP_2749  | RSP_0217 | CI/CI  | O | 426 | 73 | 0.733817 | 4.00057 | 0.54474  | 0.945413 |
| 163 | RSP_2779  | RSP_2380 | CI/CI  | O | 599 | 58 | 0.477310 | 3.89028 | -0.38374 | 0.850766 |
| 164 | RSP_2781  | RSP_0899 | CI/CI  | O | 172 | 64 | 0.584313 | 3.17757 | 0.45196  | 0.895072 |
| 165 | RSP_2846  | RSP_0154 | CI/CI  | O | 293 | 64 | 0.551715 | 3.68567 | 0.70291  | 0.967964 |
| 166 | RSP_2856  | RSP_0704 | CI/CI  | O | 624 | 61 | 0.517289 | 4.20314 | 0.86811  | 0.989641 |
| 167 | RSP_2888  | RSP_3341 | CI/CII | O | 145 | 62 | 0.477006 | 2.97673 | 0.95796  | 0.983533 |
| 168 | RSP_2907  | RSP_2977 | CI/CI  | O | 363 | 58 | 0.506520 | 3.69699 | 0.88859  | 0.988763 |
| 169 | RSP_2909  | RSP_3743 | CI/CII | O | 321 | 60 | 0.497929 | 3.71394 | 0.63509  | 0.977449 |
| 170 | RSP_3015  | RSP_3969 | CII/PB | O | 308 | 44 | 0.329804 | 3.70467 | 0.46466  | 0.958512 |
| 171 | RSP_3028  | RSP_2984 | CII/CI | O | 407 | 46 | 0.359677 | 3.86678 | 0.57981  | 0.932895 |
| 172 | RSP_3046  | RSP_4118 | CII/PC | O | 310 | 52 | 0.447389 | 3.33577 | -0.20693 | 0.233725 |
| 173 | RSP_3098  | RSP_0118 | CII/CI | O | 293 | 67 | 0.595911 | 3.60574 | 0.36872  | 0.909865 |
| 174 | RSP_3106  | RSP_4276 | CII/PE | O | 300 | 68 | 0.595143 | 3.72807 | 0.81053  | 0.851880 |
| 175 | RSP_3113  | RSP_2316 | CII/CI | O | 425 | 72 | 0.683283 | 4.07099 | 0.17551  | 0.765243 |
| 176 | RSP_3116  | RSP_3345 | CII/CH | O | 410 | 69 | 0.675768 | 3.86288 | 0.83015  | 0.991115 |
| 177 | RSP_3134  | RSP_3475 | CII/CH | O | 548 | 66 | 0.566951 | 4.02109 | -0.59925 | 0.870252 |
| 178 | RSP_3144  | RSP_4010 | CII/PB | O | 336 | 48 | 0.360122 | 3.92080 | -0.26808 | 0.912487 |
| 179 | RSP_3187  | RSP_0125 | CII/CI | O | 536 | 57 | 0.447032 | 4.08333 | 0.70809  | 0.976573 |
| 180 | RSP_3253  | RSP_3443 | CII/CH | O | 320 | 62 | 0.575325 | 3.71720 | -0.28803 | 0.575458 |
| 181 | RSP_3268  | RSP_2956 | CII/CI | O | 665 | 42 | 0.304346 | 4.28667 | 0.25449  | 0.789881 |
| 182 | RSP_3275  | RSP_1024 | CII/CI | O | 331 | 55 | 0.469839 | 3.74790 | 0.30183  | 0.960488 |
| 183 | RSP_3288  | RSP_1444 | CII/CI | O | 285 | 69 | 0.604742 | 3.55400 | 0.35996  | 0.94116  |

|            |          |          |         |   |     |    |          |         |          |          |
|------------|----------|----------|---------|---|-----|----|----------|---------|----------|----------|
| <b>184</b> | RSP_3325 | RSP_3719 | CII/CII | I | 503 | 42 | 0.289510 | 2.52994 | -0.10224 | 0.868195 |
| <b>185</b> | RSP_3342 | RSP_1546 | CII/CI  | I | 163 | 16 | 0.099181 | 2.97302 | 0.37530  | 0.948898 |
| <b>186</b> | RSP_3349 | RSP_4072 | CII/PC  | I | 294 | 36 | 0.235649 | 3.53509 | 0.08612  | 0.880886 |
| <b>187</b> | RSP_3350 | RSP_4071 | CII/PC  | I | 340 | 36 | 0.218020 | 3.75669 | -0.02951 | 0.887346 |
| <b>188</b> | RSP_3372 | RSP_0097 | CII/CI  | O | 372 | 68 | 0.669786 | 3.81051 | 0.17696  | 0.890970 |
| <b>189</b> | RSP_3397 | RSP_3515 | CII/CH  | O | 346 | 71 | 0.652047 | 3.72637 | 0.49766  | 0.920566 |
| <b>190</b> | RSP_3398 | RSP_3657 | CII/CH  | O | 218 | 63 | 0.564273 | 3.52437 | 0.81774  | 0.985118 |
| <b>191</b> | RSP_3406 | RSP_2904 | CII/CI  | O | 325 | 61 | 0.516338 | 3.84079 | 0.81423  | 0.966895 |
| <b>192</b> | RSP_3410 | RSP_3386 | CII/CH  | O | 318 | 70 | 0.692506 | 3.69268 | 0.48639  | 0.952299 |
| <b>193</b> | RSP_3436 | RSP_6165 | CII/CH  | O | 296 | 63 | 0.576081 | 3.65107 | N/A      | N/A      |
| <b>194</b> | RSP_3497 | RSP_4069 | CII/PC  | O | 727 | 69 | 0.656009 | 4.24264 | 0.72107  | 0.948256 |
| <b>195</b> | RSP_3505 | RSP_0090 | CII/CI  | O | 315 | 69 | 0.696879 | 3.76661 | -0.17505 | 0.899837 |
| <b>196</b> | RSP_3547 | RSP_2495 | CII/CI  | O | 987 | 69 | 0.615415 | 4.23662 | 0.91117  | 0.977266 |
| <b>197</b> | RSP_3574 | RSP_2935 | CII/CI  | O | 515 | 64 | 0.577381 | 4.32380 | 0.35191  | 0.933123 |
| <b>198</b> | RSP_3608 | RSP_4107 | CII/PC  | O | 552 | 68 | 0.662650 | 4.21283 | 0.33309  | 0.920516 |
| <b>199</b> | RSP_3624 | RSP_3792 | CII/CH  | I | 238 | 8  | 0.031810 | 0.84340 | 0.77059  | 0.945248 |
| <b>200</b> | RSP_3627 | RSP_3784 | CII/CH  | I | 448 | 5  | 0.018009 | 0.16972 | N/A      | N/A      |
| <b>201</b> | RSP_3628 | RSP_3786 | CII/CH  | I | 106 | 16 | 0.139983 | 0.35132 | 0.11965  | 0.848261 |
| <b>202</b> | RSP_3664 | RSP_3405 | CII/CH  | O | 244 | 66 | 0.664541 | 3.48733 | 0.82760  | 0.976566 |
| <b>203</b> | RSP_3695 | RSP_0237 | CII/CI  | O | 376 | 69 | 0.575432 | 3.90670 | 0.42343  | 0.948438 |
| <b>204</b> | RSP_3697 | RSP_3861 | CII/PA  | O | 332 | 53 | 0.402597 | 3.67781 | 0.44463  | 0.829274 |
| <b>205</b> | RSP_3703 | RSP_1179 | CII/CI  | O | 424 | 69 | 0.577648 | 3.78361 | 0.64119  | 0.945314 |
| <b>206</b> | RSP_3843 | RSP_0024 | PA/CI   | O | 182 | 61 | 0.550560 | 3.35197 | 0.32586  | 0.926370 |
| <b>207</b> | RSP_3884 | RSP_3887 | PA/PA   | O | 392 | 69 | 0.714393 | 4.05386 | 0.65575  | 0.927851 |
| <b>208</b> | RSP_3894 | RSP_3978 | PA/PB   | I | 276 | 4  | 0.061994 | 0.10045 | 0.03151  | 0.939597 |
| <b>209</b> | RSP_3904 | RSP_7352 | PA/PE   | I | 638 | 2  | 0.347877 | 1.04557 | N/A      | N/A      |
| <b>210</b> | RSP_3906 | RSP_2981 | PA/CI   | I | 260 | 65 | 0.626281 | 3.65019 | 0.09268  | 0.693436 |
| <b>211</b> | RSP_3908 | RSP_4251 | PA/PD   | I | 185 | 1  | 0.002260 | 0.02787 | N/A      | N/A      |
| <b>212</b> | RSP_3955 | RSP_0726 | PB/CI   | O | 485 | 64 | 0.586129 | 4.06753 | -0.00354 | 0.959866 |
| <b>213</b> | RSP_3956 | RSP_3940 | PB/PB   | I | 325 | 65 | 0.509857 | 3.76807 | 0.60279  | 0.970402 |

|            |          |          |         |   |     |    |          |         |          |          |
|------------|----------|----------|---------|---|-----|----|----------|---------|----------|----------|
| <b>214</b> | RSP_3985 | RSP_3920 | PB/PA   | I | 470 | 54 | 0.391150 | 4.07772 | -0.69853 | 0.719158 |
| <b>215</b> | RSP_4008 | RSP_2813 | PB/CI   | O | 515 | 58 | 0.447920 | 4.03893 | 0.71513  | 0.978911 |
| <b>216</b> | RSP_4021 | RSP_7387 | PB/PD   | O | 418 | 61 | 0.575299 | 4.26041 | N/A      | N/A      |
| <b>217</b> | RSP_4022 | RSP_4185 | PB/PD   | O | 322 | 65 | 0.641723 | 3.90798 | 0.92184  | 0.983829 |
| <b>218</b> | RSP_4050 | RSP_4049 | CI/CI   | O | 453 | 34 | 0.656834 | 3.96129 | 0.90928  | 0.9909   |
| <b>219</b> | RSP_4053 | RSP_0834 | PC/CI   | O | 480 | 33 | 0.237894 | 4.13898 | -0.57692 | 0.875944 |
| <b>220</b> | RSP_4103 | RSP_1428 | PC/CI   | I | 473 | 59 | 0.527437 | 4.04967 | 0.28614  | 0.936994 |
| <b>221</b> | RSP_4138 | RSP_3902 | PD/PA   | I | 265 | 4  | 0.015558 | 0.10280 | N/A      | N/A      |
| <b>222</b> | RSP_4139 | RSP_3901 | PD/PA   | I | 270 | 39 | 0.289433 | 3.76069 | 0.84836  | 0.987637 |
| <b>223</b> | RSP_4165 | RSP_4182 | PD/PD   | O | 428 | 57 | 0.406397 | 3.86125 | 0.32514  | 0.908499 |
| <b>224</b> | RSP_4178 | RSP_3012 | PD/CII  | I | 119 | 26 | 0.162918 | 0.78856 | 0.57972  | 0.962900 |
| <b>225</b> | RSP_4207 | RSP_3721 | PD/CII  | I | 379 | 34 | 0.224303 | 3.96258 | -0.15449 | 0.624927 |
| <b>226</b> | RSP_4209 | RSP_3723 | PD/CII  | I | 388 | 29 | 0.193555 | 2.23114 | 0.85116  | 0.989630 |
| <b>227</b> | RSP_4252 | RSP_3907 | PD/PA   | I | 163 | 2  | 0.004987 | 0.07574 | N/A      | N/A      |
| <b>228</b> | RSP_6015 | RSP_6036 | CI/CI   | I | 78  | 35 | 0.244177 | 2.93256 | N/A      | N/A      |
| <b>229</b> | RSP_6035 | RSP_3772 | CI/CII  | I | 113 | 36 | 0.265381 | 0.94993 | N/A      | N/A      |
| <b>230</b> | RSP_6194 | RSP_6200 | CII/CII | I | 140 | 4  | 0.017398 | 0.47209 | N/A      | N/A      |
| <b>231</b> | RSP_6234 | RSP_6250 | CII/CI  | O | 324 | 61 | 0.691169 | 3.34233 | N/A      | N/A      |
| <b>232</b> | RSP_6256 | RSP_6158 | CI/CI   | I | 159 | 42 | 0.220655 | 2.75572 | N/A      | N/A      |
| <b>233</b> | RSP_7246 | RSP_4028 | PC/PB   | I | 354 | 33 | 0.216009 | 1.50637 | N/A      | N/A      |
| <b>234</b> | RSP_7390 | RSP_3896 | PD/PA   | I | 413 | 15 | 0.075829 | 0.69508 | N/A      | N/A      |

<sup>a</sup>gene name as shown in *R. sphaeroides* 2.4.1 annotation at NCBI

<sup>b</sup>location: chromosome I (CI), chromosome II (CII), or plasmids (PA,PB, PC, PD, or PE)

<sup>c</sup>paralog type: out-paralog (O) or in-paralog (I)

<sup>d</sup>average length of the duplicate genes

<sup>e</sup>percentage of amino acid divergence between protein homologs

<sup>f</sup>evolutionary constraint parameters: nonsynonymous substitution rate ( $K_a$ ) and synonymous substitution rate ( $K_s$ )

<sup>g</sup>Pearson's correlation

<sup>h</sup>cosine similarity.

Note that "N/A" is given for the pair, whose corresponding gene expression does not exist in the microarray.
