# Supplementary material for: Evolutionary constraints and expression analysis of gene duplications in Rhodobacter sphaeroides 2.4.1
Source: PubMed Central journal article supplement (PMC3494609; doi:10.1186/1756-0500-5-192), 2012-04-25

**FIG. A1.** Normalized gene expression panel of duplicated gene pairs in *R. sphaeroides* 2.4.1. Three replications of each growth condition are shown, with the following conditions: (1) 3W, (2) 10W, (3) 100W, (4) 10W DMSO, (5) Aerobic, (6) 2% Oxygen, (7) Dark DMSO. Green represents low levels of expression while red represents high levels of expression.

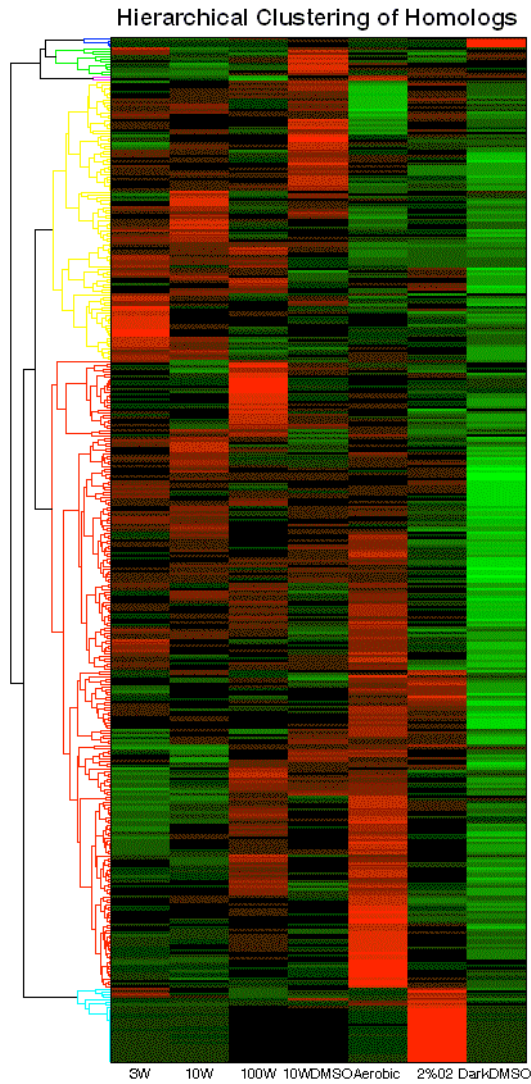

Supplement: 1756-0500-5-192-S2.pdf [file 1756-0500-5-192-S2.pdf]
