# Supplementary material for: Evolutionary constraints and expression analysis of gene duplications in Rhodobacter sphaeroides 2.4.1
Source: PubMed Central journal article supplement (PMC3494609; doi:10.1186/1756-0500-5-192), 2012-04-25

**FIG. A2.** Relationship between normalized correlation values and structural constraints on duplicated genes in *R. sphaeroides*. Out-paralogs are shown in red circles and in-paralogs are shown in blue squares: (A) In-paralog  $K_a$ , (B) In-paralog  $K_s$ , (C) In-paralog  $\omega$ , (D) Out-paralog  $K_a$ , (E) Out-paralog  $K_s$ , and (F) Out-paralog  $\omega$ .

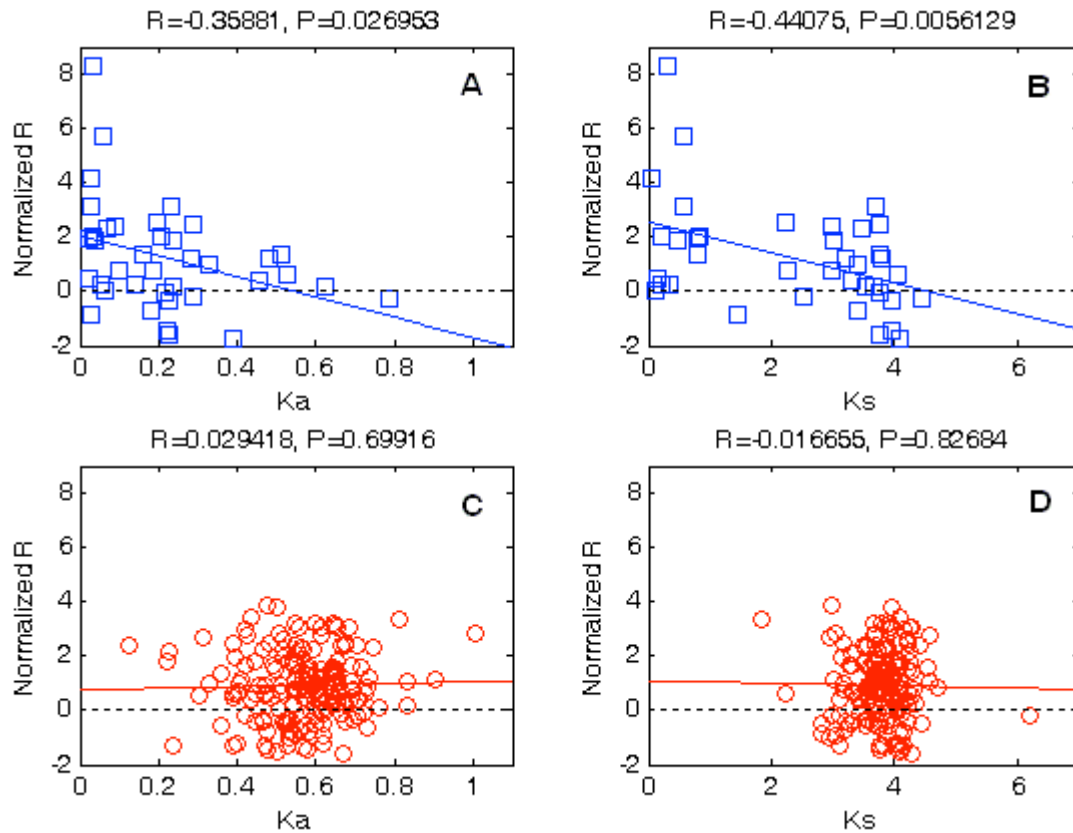

Supplement: 1756-0500-5-192-S3.pdf [file 1756-0500-5-192-S3.pdf]
